# Supplementary material
Source: PubMed Central journal article supplement (PMC3553772)
Supplement: AEM.02362-12_zam999104011so1.pdf [file AEM.02362-12_zam999104011so1.pdf]

## Enhanced gene detection assays for fumarate-adding enzymes allow uncovering anaerobic hydrocarbon degraders in terrestrial and marine systems

Frederick von Netzer<sup>1</sup>, Giovanni Pilloni<sup>1</sup>, Sara Kleindienst<sup>2,§</sup>, Martin Krüger<sup>3</sup>, Katrin Knittel<sup>2</sup>, Friederike Gründger<sup>3</sup> and Tillmann Lueders<sup>1\*</sup>

### Supplementary table S1: Overview of published FAE gene primer sets

This table gives an overview of published primers used in enrichments and environmental samples. Primer target positions are indicated on gene and protein level for the *bss* operon and *bssA* subunit of *Thauera aromatica* K127 (7) as a reference. Primers of Shinoda *et al.* (8) for *Magnetospirillum* strains are not included in this list. From the primer sets developed by Callaghan *et al.* (5), only the sets are given which were used for environmental samples and enrichments.

#### Supplementary references:

1. **Beller, H. R., S. R. Kane, T. C. Legler, and P. J. Alvarez.** 2002. A real-time polymerase chain reaction method for monitoring anaerobic, hydrocarbon-degrading bacteria based on a catabolic gene. *Environ. Sci. Technol.* **36**:3977-3984.
2. **Beller, H. R., S. R. Kane, T. C. Legler, J. R. McKelvie, B. Sherwood Lollar, F. Pearson, L. Balser, and D. M. Mackay.** 2008. Comparative Assessments of Benzene, Toluene, and Xylene Natural Attenuation by Quantitative Polymerase Chain Reaction Analysis of a Catabolic Gene, Signature Metabolites, and Compound-Specific Isotope Analysis. *Environ. Sci. Technol.* **42**:6065-6072.
3. **Botton, S., M. van Harmelen, M. Braster, J. R. Parsons, and W. F. M. Röling.** 2007. Dominance of Geobacteraceae in BTX-degrading enrichments from an iron-reducing aquifer. *FEMS Microbiol. Ecol.* **62**:118-130.
4. **Callaghan, A. V., B. Wawrik, S. M. Ni Chadhain, L. Y. Young, and G. J. Zylstra.** 2008. Anaerobic alkane-degrading strain AK-01 contains two alkylsuccinate synthase genes. *Biochem. Biophys. Res. Commun.* **366**:142-148.
5. **Callaghan, A. V., I. A. Davidova, K. Savage-Ashlock, V. A. Parisi, L. M. Gieg, J. M. Suffita, J. J. Kukor, and B. Wawrik.** 2010. Diversity of Benzyl- and Alkylsuccinate Synthase Genes in Hydrocarbon-Impacted Environments and Enrichment Cultures. *Environ. Sci. Technol.* **44**:7287-7294.
6. **Kolukirik, M., O. Ince, and B. Ince.** 2011. Increment in Anaerobic Hydrocarbon Degradation Activity of Halic Bay Sediments via Nutrient Amendment. *Microbial Ecology* **61**:871-884.
7. **Leuthner, B., C. Leutwein, H. Schulz, P. Horth, W. Haehnel, E. Schiltz, H. Schagger, and J. Heider.** 1998. Biochemical and genetic characterization of benzylsuccinate synthase from *Thauera aromatica*: a new glyceryl radical enzyme catalysing the first step in anaerobic toluene metabolism. *Molecular Microbiology* **28**:615-628.
8. **Shinoda, Y., J. Akagi, Y. Uchihashi, A. Hiraishi, H. Yukawa, H. Yurimoto, Y. Sakai, and N. Kato.** 2005. Anaerobic degradation of aromatic compounds by *Magnetospirillum* strains: Isolation and degradation genes. *Bioscience, Biotechnology, and Biochemistry* **69**:1483-1491.
9. **Staats, M., M. Braster, and W. F. M. Röling.** 2011. Molecular diversity and distribution of aromatic hydrocarbon-degrading anaerobes across a landfill leachate plume. *Environ. Microbiol.* **13**:1216-1227.
10. **Washer, C. E., and E. A. Edwards.** 2007. Identification and expression of benzylsuccinate synthase genes in a toluene-degrading methanogenic consortium. *Appl. Environ. Microbiol.* **73**:1367-1369.
11. **Winderl, C., S. Schaefer, and T. Lueders.** 2007. Detection of anaerobic toluene and hydrocarbon degraders in contaminated aquifers using benzylsuccinate synthase (*bssA*) genes as a functional marker. *Environ. Microbiol.* **9**:1035-1046.

|                                       | forward primer                                                              |                                   |                                            |                                                                                                       | reverse primer                    |                                            |                  |  |
|---------------------------------------|-----------------------------------------------------------------------------|-----------------------------------|--------------------------------------------|-------------------------------------------------------------------------------------------------------|-----------------------------------|--------------------------------------------|------------------|--|
|                                       | sequence (5'-3')<br>Protein (K127)                                          | bss operon<br>(12448 bp,<br>K127) | bssA<br>(6560-9145 bp,<br>K127 bss operon) | sequence (5'-3')<br>reverse complement<br>Protein (K127)                                              | bss operon<br>(12448 bp,<br>K127) | bssA<br>(6560-9145 bp,<br>K127 bss operon) | Amplicon<br>(bp) |  |
| Beller et al. (2002) <sup>1</sup>     | AC GAC GGY GGC ATT TCT C<br>D D G G I S P                                   | 8744 8762                         | 2184 2202                                  | G CAT GAT SGG YAC CGA CA<br>TG TCG GTR CCS ATC GTA C<br>L S V P I M R                                 | 8859 8876                         | 2299 2286                                  | 132              |  |
| Washer & Edwards (2007) <sup>10</sup> | BssA327f<br>C GAA TTC ATC NTC GGC TAC C<br>D E F I V G Y H                  | 6886 6905                         | 326 345                                    | BssA2004r<br>GTC GTC RTT GCC CCA YTT NGG<br>CCN AAR TGG GGC AAY GAC GAC<br>P K W G H D D              | 8543 8563                         | 1983 1973                                  | 1677             |  |
|                                       | MBssA1516f<br>AG ACC CAG AAG ACC AGG TC<br>K A Q K T R S                    | 8055 8073                         | 1495 1513                                  | MBssA2446r<br>ATG CTT TTC AGG CTC CCT CT<br>AG AGG GAG CCT GAA AAG CAT<br>Q R E P E K H               | 8988 9007                         | 2428 2417                                  | 952              |  |
|                                       | BssA1985f<br>CN AAR TGG GGC AAY GAC GA<br>P K W G N D D                     | 8544 8562                         | 1984 2002                                  | BssA2524r<br>AT GAT SGT GTT YTG SCC RTA GGT<br>ACC TAY GGS CAR AAC ACS ATC AT<br>T Y G Q N T I I      | 9062 9084                         | 2524 2494                                  | 540              |  |
|                                       | bssA1-416f<br>CA GAA CAC AAA GTA TGC CC<br>L K S K Y S P                    | 6972 6989                         | 412 429                                    | bssA1-749r<br>TGG AGT TCC AGA GGT CGA TT<br>AA TCG ACC TCT GGA ACT CCA<br>K I D N W K A               | 7284 7304                         | 744 714                                    | 332              |  |
|                                       | bssA2-413f<br>TAC CTG CAG AGC AAG TAC GC<br>Y L K S K Y S                   | 6968 6987                         | 408 427                                    | bssA2-713r<br>A CTT CAG CTT ATC GGC GTT C<br>G AAC GCC GAT AAG CTG AAG T<br>W H A P S G L E           | 7252 7271                         | 711 681                                    | 303              |  |
|                                       | 7772f<br>GAC ATG ACC GAC GCS ATY CT<br>D M T D A I L                        | 7772 7791                         | 1212 1231                                  | 8546r<br>TC GTC GTC RTT GCC CCA YTT<br>AAR TGG GGC AAY GAC GAC GA<br>K W G H D D D                    | 8546 8565                         | 1986 2005                                  | 793              |  |
| Botton et al. (2007) <sup>11</sup>    | TC GAY GAY GGC TGC ATG GA<br>L D D G C M E                                  | 8322 8340                         | 1762 1780                                  | TT CTG GTT YTT CTG CAC<br>GTG CAG AAR AAC CAG AA<br>V Q K N Q K                                       | 8819 8835                         | 2259 2275                                  | 513              |  |
| Callaghan et al. (2008) <sup>4</sup>  | bssA 1230F<br>GAC ATG ACC GAY GCC ATY CT<br>D M T D A I L                   | 7772 7791                         | 1212 1231                                  | bssA 2000R<br>TC GTC GTC RTT GCC CCA YTT<br>AAR TGG GGC AAY GAC GAC GA<br>K W G H D D D               | 8546 8565                         | 1986 2005                                  | 793              |  |
| Beller et al. (2008) <sup>2</sup>     | SRBf<br>GTS CCC ATG ATG CGC AGC<br>V P I M R S                              | 8865 8882                         | 2305 2322                                  | SRBr<br>C GAC ATT GAA CTG CAC GTG RTC G<br>C GAY CAC GTG CAG TTC AAT GTC G<br>I D H V Q F N V V       | 8939 8961                         | 2379 2401                                  | 96               |  |
| Callaghan et al. (2010) <sup>5</sup>  | Primer Set 1<br>TTT GAG TGC ATC CGC CAY GGI CT<br>F E C I R H G L           | 7879 7902                         | 1319 1342                                  | Primer Set 1<br>TC GTC RTT GCC CCA TTT IGG IGC<br>GCY CCY AAA TGG GGC AAY GAC GA<br>A P K W G H D D D | 8540 8562                         | 1980 2002                                  | 683              |  |
|                                       | Primer Set 5<br>TTY GAG TGY ATN CGC CAS GGC<br>F E C I R H G                | 7879 7902                         | 1319 1342                                  | Primer Set 5<br>TC RTC ATT NCC CCA YTT NGG<br>CCN AAR TGG GGN AAT GAY GA<br>P K W G H D D             | 8543 8562                         | 1983 2002                                  | 683              |  |
|                                       | Primer Set 9<br>CC NAC CAC NAA GCA YGG<br>G L A G R R                       | 8037 8053                         | 1477 1493                                  | Primer Set 9<br>TC GTC RTT GCC CCA TTT IGG IGC<br>GCY CCY AAA TGG GGC AAY GAC GA<br>A P K W G H D D D | 8540 8562                         | 1980 8518                                  | 525              |  |
| Staats et al. (2011) <sup>6</sup>     | bssA3f<br>TC GAY GAY GGS TGC ATG GA<br>L D D G C M E                        | 8322 8340                         | 1762 1780                                  | bssAr<br>TT CTG GTT YTT CTG CAC<br>GTG CAG AAR AAC CAG AA<br>V Q K N Q K                              | 8819 8835                         | 2259 2275                                  | 513              |  |
| Koulikirik et al. (2011) <sup>6</sup> | bssA_715f<br>WGG ATC GMC AAG ATC GAY RA<br>W I D K I D N                    | 7274 7293                         | 714 733                                    | bssA_1107r<br>GNC IWA ARG TYT CMG ARC AR<br>RT GYT CKG ARA CYT TSA GNC<br>R L K V S E H               | 7647 7666                         | 1087 1106                                  | 392              |  |
|                                       | assA_1578f<br>K GAY TTT GAG SAS CTT TTC S<br>A T F D Q L W E                | 8194 8213                         | 1634 1653                                  | assA_1967r<br>GA CGA CGA YTA YGT GGA CGA<br>TCG TCC ACR TAR TCG TCG TC<br>D D D D A D V               | 8558 8577                         | 1998 2017                                  | 383              |  |
| von Netzer et al. (this study)        | 77768f (FAE-B)<br>C AAY GAT TTA ACC RAC GCC AT<br>C N D M T D A I           | 7768 7788                         | 1208 1228                                  | 8543r (FAE-B)<br>TC GTC RTT GCC CCA YTT NGG<br>CCN AAR TGG GGC AAY GAC GA<br>P K W G H D D            | 8543 8562                         | 1983 2002                                  | 794              |  |
|                                       | 7363f (FAE-N)<br>TC GCC GAG AAT TTC GAY TTG<br>V A E H F - -                | 7363 -                            | 803 -                                      | 8543r (FAE-N)<br>TC GTC RTT GCC CCA YTT NGG<br>CCN AAR TGG GGC AAY GAC GA<br>P K W G H D D            | 8543 8562                         | 1983 2002                                  | 1199             |  |
|                                       | 7374f (FAE-N)<br>TTC GAY TTG AGC GAC AGC GT<br>F - - - - -                  | 7374 -                            | 814 -                                      | 8543r (FAE-N)<br>TC GTC RTT GCC CCA YTT NGG<br>CCN AAR TGG GGC AAY GAC GA<br>P K W G H D D            | 8543 8562                         | 1983 2002                                  | 1188             |  |
|                                       | 7757r-1 FAE-Kf (FAE-KM)<br>TCG GAC GCG TGC AAC GAT CTG A<br>S D A C N D M T | 7757 7778                         | 1197 1218                                  | 8543r (FAE-KM)<br>TC GTC RTT GCC CCA YTT NGG<br>CCN AAR TGG GGC AAY GAC GA<br>P K W G H D D           | 8543 8562                         | 1983 2002                                  | 805              |  |
|                                       | 7757r-2 FAE-Kf (FAE-KM)<br>TCG GAC GCG TGC AAC GCC CTG A<br>S D A C N D M T | 7757 7778                         | 1197 1218                                  | 8543r (FAE-KM)<br>TC GTC RTT GCC CCA YTT NGG<br>CCN AAR TGG GGC AAY GAC GA<br>P K W G H D D           | 8543 8562                         | 1983 2002                                  | 805              |  |
|                                       | 7766f FAE-Mf (FAE-KM)<br>TGT AAC GGC ATG ACC ATT GCG CT<br>C N D M T D A I  | 7766 7788                         | 1206 7810                                  | 8543r (FAE-KM)<br>TC GTC RTT GCC CCA YTT NGG<br>CCN AAR TGG GGC AAY GAC GA<br>P K W G H D D           | 8543 8562                         | 1983 2002                                  | 796              |  |
